# Supplementary material
Source: PubMed Central journal article supplement (PMC3435544)

## Supplemental Figures

### Supplementary Figure Legends

**Figure S1. Effect of pH on the size of HDL<sub>2</sub>.** (A) SEC Profile of HDL<sub>2</sub> at different pH. HDL<sub>2</sub> (1 mg/ml) was incubated in either 20 mM MES (pH 5.5) or 20 mM Tris (pH 7.5) for 24 h after which HDL samples were centrifuged at 10 000 g for 10 min. Aliquots of the supernatants (50 µl) were injected into the Superose HR6 column and eluted with PBS buffer (pH 7.4). Main fractions are labeled as Peaks I and II. nHDL<sub>2</sub> = non-incubated HDL<sub>2</sub>. Each profile is representative of three to four independent experiments. (B) HDL<sub>3</sub> or (C) HDL<sub>2</sub> (1 mg/ml) was incubated at pH 5.5 for 24 h and aliquots of nHDL and acidic pH-treated HDL (10 µg) were loaded on 0.6% agarose gel using the Paragon electrophoresis system and proteins were transferred from the agarose gel to the polyvinylidene difluoride (PVDF) membrane by pressure blotting. ApoA-I was identified using a monoclonal anti-human apoA-I antibody.

**Figure S2. Effect of pH on structure of LDL.** (A) SEC Profile of LDL at different pH. LDL (1 mg/ml) was incubated in either 20 mM MES (pH 5.5) or 20 mM Tris (pH 7.5) for 24 h after which LDL samples were centrifuged at 10 000 g for 10 min. Aliquots of supernatant (100 µl) were injected into Superose HR6 column and eluted with PBS buffer (pH 7.4). (B) Far-UV CD analysis of LDL. LDL (1 mg/ml) was incubated in 20 mM MES (pH 5.5) or 20 mM Tris (pH 7.5) for 30 min, after which aliquots of samples were diluted to 50 µg/ml for CD measurement as described in the Methods. nLDL= non-incubated LDL. Data are representative of at least two independent experiments.

**Figure S3. Time-dependent effect of acidic pH on HDL<sub>2</sub>.** (A) SEC Profile of HDL<sub>2</sub> at different incubation times. HDL<sub>2</sub> (1 mg/ml) was incubated in 20 mM MES (pH 5.5) for the indicated times. Aliquots of the supernatants (50  $\mu$ l) were analyzed by SEC. Each profile is representative of at least two independent experiments. (B) Time-dependent effect of acidic pH on pre $\beta$ -HDL level. HDL<sub>2</sub> (1 mg/ml) was incubated for various times at pH 7.5 or pH 5.5 after which  $\alpha$ -HDL and pre $\beta$ -HDL contents were measured using 2-dimensional crossed immunoelectrophoresis. The amounts of pre $\beta$ -HDL are expressed as a percentage of the sum of the pre $\beta$ - and  $\alpha$ -mobile areas.

**Figure S4. Effect of acidic pH on HDL<sub>3</sub> size and pre $\beta$ -HDL formation as a function of HDL<sub>3</sub> concentration.** (A) SEC Profile of HDL<sub>3</sub> at different concentrations. HDL<sub>3</sub> at different concentrations (0.1-2 mg /ml) was incubated in 20 mM MES (pH 5.5) for 24 h after which the samples were analyzed by SEC. Aliquots of the supernatants (50  $\mu$ l for HDL<sub>3</sub> at concentration 0.5-2 mg/ml and 100  $\mu$ l for HDL<sub>3</sub> at concentration below 0.25 mg/ml) were injected into Superose HR6 column and eluted with PBS buffer (pH 7.4). Main fractions are labeled as Peaks I and II. Non-incubated HDL<sub>3</sub> (1 mg/ml) served as a control. Each profile is representative of at least two independent experiments. (B) Formation of acidic pH-induced pre $\beta$ -HDL at low concentration. HDL<sub>3</sub> (0.1-0.25 mg /ml) was incubated in 20 mM MES (pH 5.5) for 24 h after which  $\alpha$ -HDL and pre $\beta$ -HDL contents were measured using 2-dimensional crossed immunoelectrophoresis. The amounts of pre $\beta$ -HDL are expressed as a percentage of the sum of the pre $\beta$ - and  $\alpha$ -mobile areas.

**Figure S1**

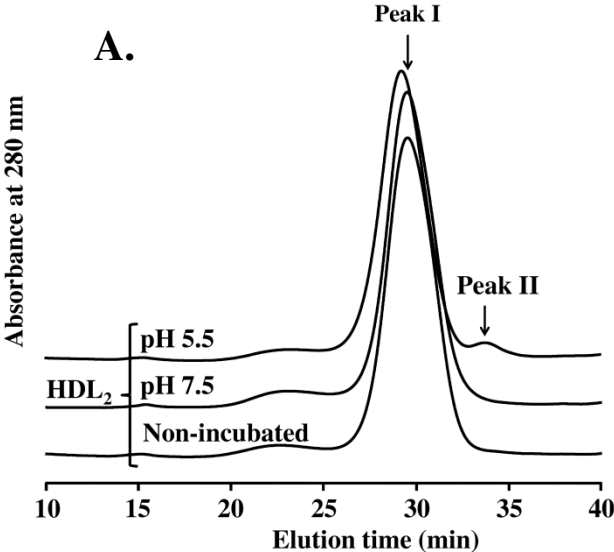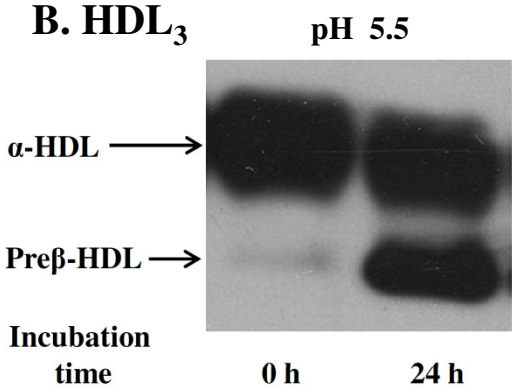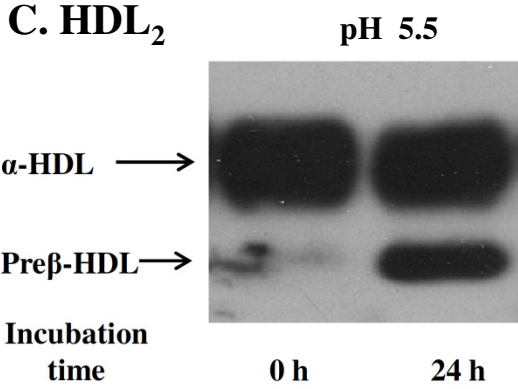

Figure S2

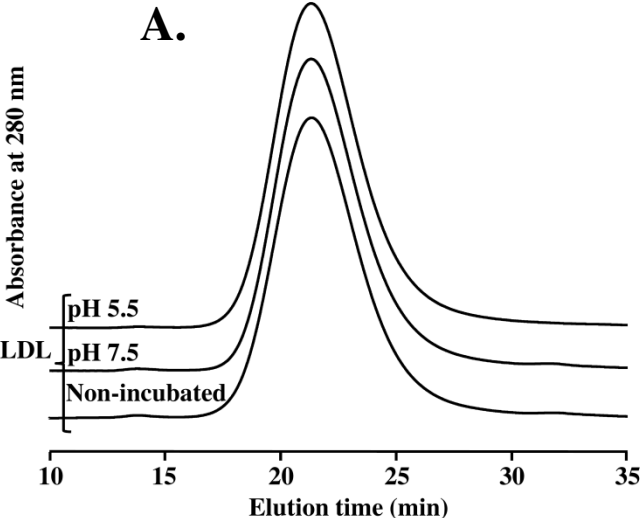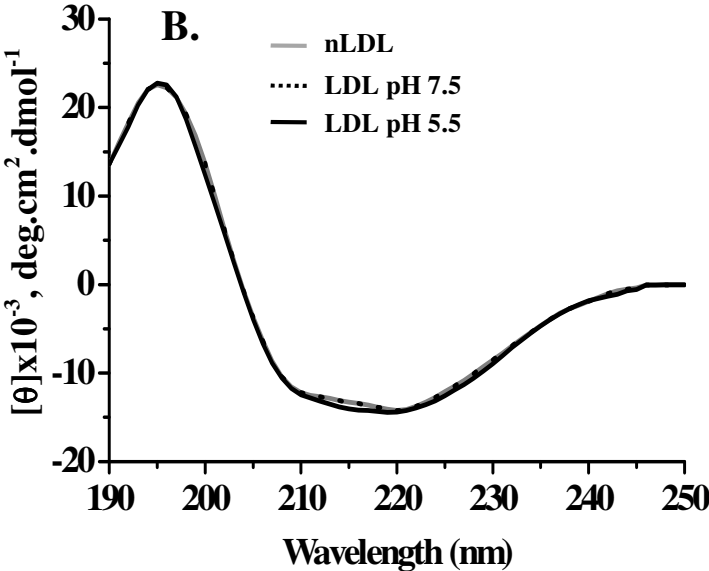

Figure S3

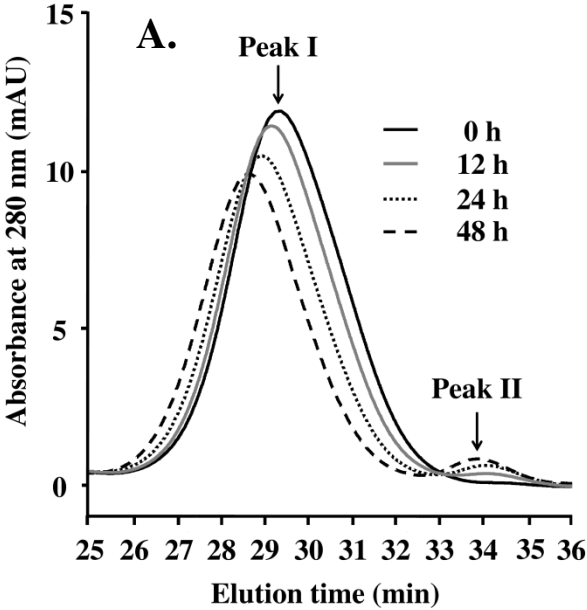

**B.**

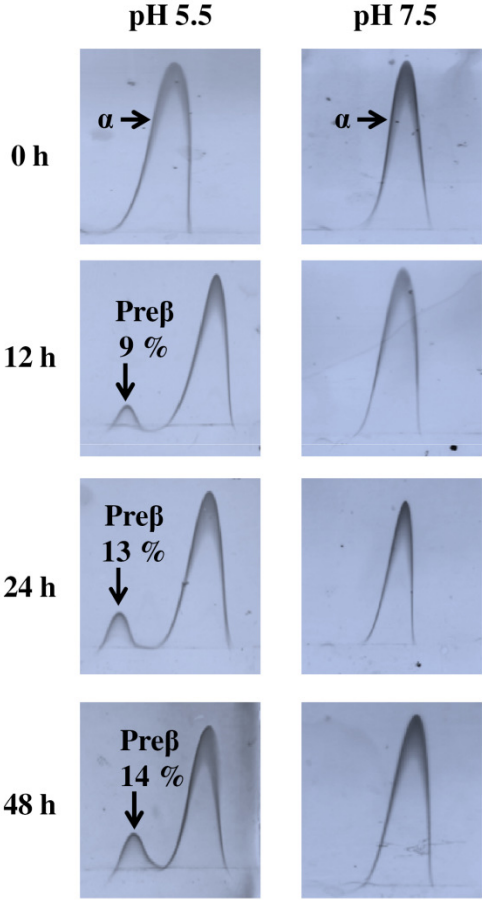

**Figure S4**

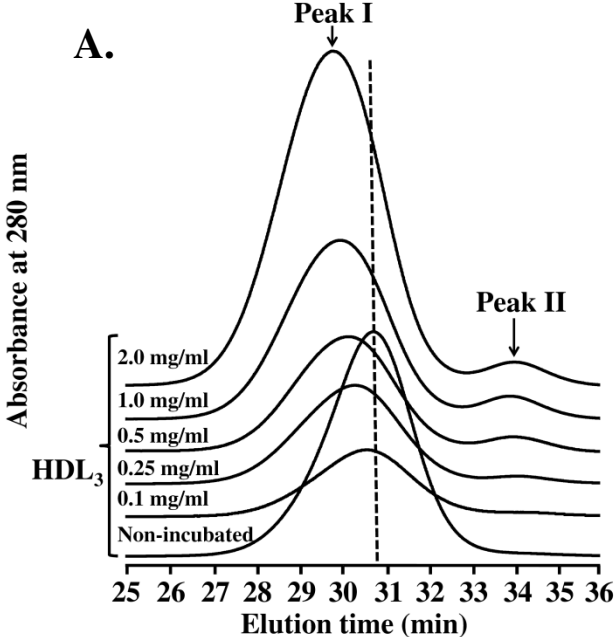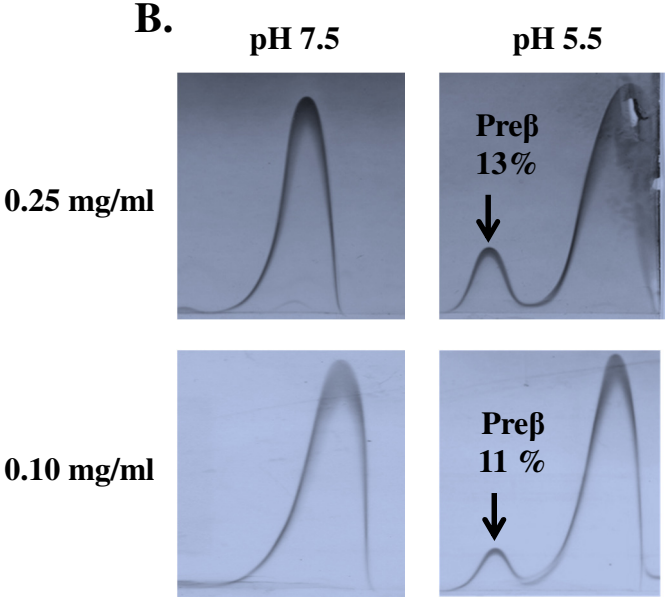

Supplement: supp_M028118_jlr.M028118-1.pdf [file supp_M028118_jlr.M028118-1.pdf]
